# Supplementary material
Source: MDPI journal article supplement (https://www.mdpi.com/1424-2818/13/8/350)
Supplement: s1 [file s1 › diversity-1308702-supplementary.pdf]

**Supplementary Materials:** The following are available online at [www.mdpi.com/xxx/s1](http://www.mdpi.com/xxx/s1), Figure S1: Heatmap clustered by rows showing the DESeq2 normalized abundance of the top twenty most abundant bacterial genus for both high and low (based on mean values) *C. irritans* abundance (eDNA) between January and August 2020 from a marine sea cage fish farm from Hong Kong, Table S1: Synthetic sequence of the positive control targeting 18S SSU-rDNA gene from *C. irritans* for quantitative PCR and droplet digital PCR.

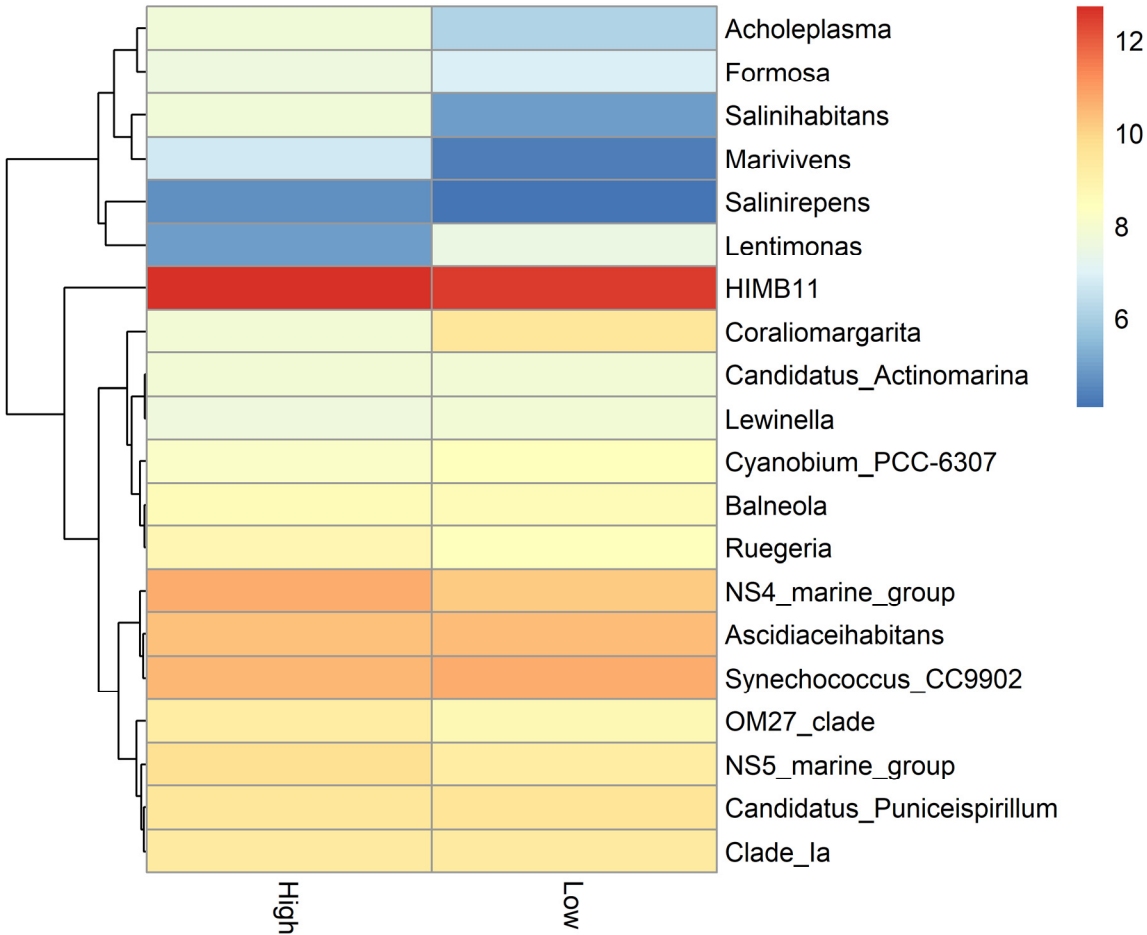

**Figure S1.** Heatmap clustered by rows showing the DESeq2 normalized abundance of the top twenty most abundant bacterial genus for both high and low (based on mean values) *Cryptocaryon irritans* abundance (eDNA) between January and August 2020 from a marine sea cage fish farm from Hong Kong.

**Table S1.** Synthetic sequence of the positive control targeting 18S SSU-rDNA gene from *Cryptocaryon irritans* for quantitative PCR and droplet digital PCR.

| Positive control               | Synthetic sequence 5' → 3' | Length (bp) | Mass (mg) | Copy number/μL          |
|--------------------------------|----------------------------|-------------|-----------|-------------------------|
| Pos_control <i>C. irritans</i> | GCTTGTA                    | 111         | 0.06      | 5.85 x 10 <sup>13</sup> |
|                                | CTGATTACGTC                |             |           |                         |
|                                | CCCTTTGTACACACCGCCCGTC     |             |           |                         |
|                                | GCTCCTACCGATTTCGAGTGAT     |             |           |                         |
|                                | CCGGTGAACCTTCTGGACTGCG     |             |           |                         |
|                                | CTAACACTAGTTAGTGCGGAAG     |             |           |                         |
